# Supplementary material
Source: PubMed Central journal article supplement (PMC6461759)

## Supplementary material

**Supplementary Table 1.** Mean total sperm length of 31 males of *L. megarhynchos* (LM) and 16 males of *L. luscinia* (LL).

| Individual | Sperm length ( $\mu\text{m}$ ) | Individual | Sperm length ( $\mu\text{m}$ ) |
|------------|--------------------------------|------------|--------------------------------|
| LM1        | 271.885                        | LL1        | 218.695                        |
| LM2        | 277.795                        | LL2        | 234.185                        |
| LM3        | 279.195                        | LL3        | 234.085                        |
| LM4        | 270.865                        | LL4        | 240.290                        |
| LM5        | 279.040                        | LL5        | 225.730                        |
| LM6        | 280.540                        | LL6        | 241.075                        |
| LM7        | 270.870                        | LL7        | 227.270                        |
| LM8        | 269.260                        | LL8        | 245.210                        |
| LM9        | 277.330                        | LL9        | 228.960                        |
| LM10       | 273.225                        | LL10       | 235.455                        |
| LM11       | 276.960                        | LL11       | 230.620                        |
| LM12       | 272.760                        | LL12       | 233.580                        |
| LM13       | 260.900                        | LL13       | 247.865                        |
| LM14       | 263.925                        | LL14       | 235.170                        |
| LM15       | 262.420                        | LL15       | 238.555                        |
| LM16       | 275.515                        | LL16       | 217.685                        |
| LM17       | 267.410                        |            |                                |
| LM18       | 279.705                        |            |                                |
| LM19       | 272.835                        |            |                                |
| LM20       | 280.975                        |            |                                |
| LM21       | 270.295                        |            |                                |
| LM22       | 273.670                        |            |                                |
| LM23       | 262.620                        |            |                                |
| LM24       | 275.385                        |            |                                |
| LM25       | 268.130                        |            |                                |
| LM26       | 276.680                        |            |                                |
| LM27       | 276.195                        |            |                                |
| LM28       | 271.450                        |            |                                |
| LM29       | 265.855                        |            |                                |
| LM30       | 270.085                        |            |                                |
| LM31       | 267.010                        |            |                                |

**Supplementary Table 2.** A list of 12 Z-linked intronic loci analyzed in this study and their position on the Z chromosome.

| Locus           | Ensembl gene ID    | Gene name | Position (Mb) <sup>1</sup> |
|-----------------|--------------------|-----------|----------------------------|
| <i>TG401</i>    | ENSTGUG00000000401 | SPTLC1    | 6.1                        |
| <i>SPINZ-2*</i> | ENSTGUG00000000468 | SPIN1     | 7.5                        |
| <i>TG853</i>    | ENSTGUG00000000853 | TRPM3     | 16.9                       |
| <i>TG1015</i>   | ENSTGUG00000001015 | APC       | 21.2                       |
| <i>TG1505</i>   | ENSTGUG00000001505 | ACO1      | 31.9                       |
| <i>TG1925</i>   | ENSTGUG00000001925 | TARS      | 40.8                       |
| <i>GHR-5.2*</i> | ENSTGUG00000002265 | GHR       | 44.1                       |
| <i>ADAMTS6*</i> | ENSTGUG00000002799 | ADAMTS6   | 50.7                       |
| <i>PPWD1*</i>   | ENSTGUG00000002834 | PPWD1     | 50.9                       |
| <i>TG5287</i>   | ENSTGUG00000005287 | RFX3      | 64.5                       |
| <i>VLDLR-7</i>  | ENSTGUG00000005386 | VLDLR     | 64.7                       |
| <i>TG5729</i>   | ENSTGUG00000005729 | TNPO1     | 66.2                       |

\* Sequences of these loci were taken from a previous study (Storchová *et al.* 2010). The rest of loci were sequences in this study.

<sup>1</sup> Genomic position in the Zebra Finch (*Taeniopygia guttata*) genome (assembly taeGut3.2.4, August 2008). The total length of the Z chromosome is 73 Mb.

**Supplementary Table 3.** Sequences of primers used for PCR amplification and sequencing of 8 Z-linked intronic loci.

| Locus          | Reference for primer sequences | Forward primer (5' - 3')  | Reverse primer (5' - 3') |
|----------------|--------------------------------|---------------------------|--------------------------|
| <i>TG401</i>   | This study                     | TTTTCTCCAGCATTGCACTT      | TTTTCTTCTTTCTCCAGATAGCG  |
| <i>TG853</i>   | This study                     | GCACAGAAATCATGGATAGAAAGA  | CATGGCTTTATTGGAGTGGC     |
| <i>TG1015</i>  | This study                     | TTGAGGAACTTGTCTGCTGGC     | GAAATGCAAGAGCACCATCA     |
| <i>TG1505</i>  | This study                     | CCCAACACCCGTGCTAACTA      | AGACCTCCTTGAACATCCCA     |
| <i>TG1925</i>  | This study                     | TGAAAGACTGGAAGTTAAGAAGGAA | TCTCATTGAGGATGCGACAC     |
| <i>TG5287</i>  | This study                     | GAGTCTTTATCGAGAGCACTGTGA  | AATAGCGCCAGAAAGTTTGC     |
| <i>TG5729</i>  | This study                     | GTTTGTCTCAAGAGGTGGC       | CATGGTACATATCCCACGGA     |
| <i>VLDLR-7</i> | Borge <i>et al.</i> 2005       | CAGAAGTGGAGAATGCATAG      | ACAGTCACATTCATAGCCAA     |

**Supplementary Table 4.** Polymorphism statistics for 12 Z-linked and 8 autosomal intronic loci.

| Locus          | Chr | L <sup>1</sup> | Species <sup>2</sup> | n <sup>3</sup> | S <sup>4</sup> | $\pi$ (%) <sup>5</sup> | $\theta$ (%) <sup>6</sup> | D <sub>xy</sub> (%) <sup>7</sup> | Rm <sup>8</sup> | R <sup>9</sup> |
|----------------|-----|----------------|----------------------|----------------|----------------|------------------------|---------------------------|----------------------------------|-----------------|----------------|
| <i>ADAMTS6</i> | Z   | 483            | LM                   | 50             | 3              | 0.110                  | 0.139                     | 2.133                            | 1               | 0.022          |
|                |     |                | LL                   | 50             | 8              | 0.307                  | 0.370                     | 2.075                            | 1               | 0.014          |
| <i>GHR-5.2</i> | Z   | 404            | LM                   | 50             | 8              | 0.302                  | 0.442                     | 4.772                            | 0               | 0.345          |
|                |     |                | LL                   | 50             | 13             | 0.451                  | 0.718                     | 4.144                            | 1               | 0.113          |
| <i>PPWD1</i>   | Z   | 574            | LM                   | 44             | 10             | 0.189                  | 0.400                     | 4.328                            | 0               | 0.000          |
|                |     |                | LL                   | 42             | 8              | 0.265                  | 0.324                     | 3.824                            | 0               | 0.135          |
| <i>SPINZ-2</i> | Z   | 822            | LM                   | 50             | 6              | 0.191                  | 0.163                     | 4.063                            | 0               | 0.020          |
|                |     |                | LL                   | 50             | 19             | 0.350                  | 0.516                     | 4.195                            | 0               | 0.008          |
| <i>TG401</i>   | Z   | 754            | LM                   | 50             | 12             | 0.224                  | 0.355                     | 4.857                            | 1               | 0.000          |
|                |     |                | LL                   | 46             | 5              | 0.040                  | 0.151                     | 4.662                            | 0               | 0.002          |
| <i>TG853</i>   | Z   | 631            | LM                   | 50             | 20             | 0.714                  | 0.708                     | /                                | 2               | 0.008          |
|                |     |                | LL                   | 40             | 40             | 0.854                  | 1.490                     | /                                | 5               | 0.055          |
| <i>TG1015</i>  | Z   | 641            | LM                   | 42             | 10             | 0.285                  | 0.363                     | 3.896                            | 0               | 0.000          |
|                |     |                | LL                   | 44             | 12             | 0.457                  | 0.430                     | 3.315                            | 0               | 0.016          |

|                |          |            |           |             |             |              |              |              |            |              |
|----------------|----------|------------|-----------|-------------|-------------|--------------|--------------|--------------|------------|--------------|
| <i>TG1505</i>  | Z        | 521        | LM        | 46          | 12          | 0.817        | 0.524        | 5.620        | 2          | 0.031        |
|                |          |            | LL        | 40          | 13          | 0.386        | 0.587        | 5.557        | 1          | /            |
| <i>TG1925</i>  | Z        | 597        | LM        | 31          | 3           | 0.032        | 0.126        | 7.041        | 0          | /            |
|                |          |            | LL        | 26          | 17          | 0.745        | 0.746        | 6.829        | 1          | 0.023        |
| <i>TG5287</i>  | Z        | 558        | LM        | 38          | 4           | 0.157        | 0.171        | 6.131        | 0          | 0.880        |
|                |          |            | LL        | 44          | 8           | 0.193        | 0.330        | 6.040        | 0          | /            |
| <i>TG5729</i>  | Z        | 452        | LM        | 40          | 1           | 0.022        | 0.052        | 2.666        | 0          | /            |
|                |          |            | LL        | 22          | 6           | 0.215        | 0.364        | 2.605        | 0          | 0.092        |
| <i>VLDLR-7</i> | Z        | 431        | LM        | 46          | 9           | 0.381        | 0.475        | 5.407        | 1          | 0.007        |
|                |          |            | LL        | 42          | 12          | 0.455        | 0.647        | 5.602        | 1          | 0.225        |
| <b>All</b>     | <b>Z</b> | <b>572</b> | <b>LM</b> | <b>44.8</b> | <b>8.17</b> | <b>0.285</b> | <b>0.327</b> | <b>4.629</b> | <b>0.6</b> | <b>0.131</b> |
|                |          |            | <b>LL</b> | <b>41.3</b> | <b>13.4</b> | <b>0.393</b> | <b>0.556</b> | <b>4.441</b> | <b>0.8</b> | <b>0.068</b> |
| <i>CKB-2</i>   | A        | 453        | LM        | 48          | 7           | 0.369        | 0.348        | 0.814        | 0          | 0.015        |
|                |          |            | LL        | 50          | 14          | 0.624        | 0.690        | 1.307        | 5          | 0.073        |
| <i>ACTB-3</i>  | A        | 291        | LM        | 40          | 15          | 1.671        | 1.212        | 3.505        | 1          | 0.037        |
|                |          |            | LL        | 42          | 23          | 1.471        | 1.837        | 3.068        | 3          | 0.514        |
| <i>GAPD-3</i>  | A        | 133        | LM        | 44          | 3           | 0.828        | 0.519        | 4.033        | 1          | 1.015        |

|                |          |            |           |             |             |              |              |              |            |              |
|----------------|----------|------------|-----------|-------------|-------------|--------------|--------------|--------------|------------|--------------|
|                |          |            | LL        | 46          | 1           | 0.064        | 0.171        | 3.792        | 0          | /            |
| <i>ALASI-8</i> | A        | 377        | LM        | 38          | 11          | 0.634        | 0.694        | 4.761        | 3          | 0.222        |
|                |          |            | LL        | 34          | 17          | 0.818        | 1.103        | 4.595        | 3          | 0.246        |
| <i>GHI-2</i>   | A        | 547        | LM        | 40          | 18          | 0.667        | 0.774        | 5.495        | 4          | 0.135        |
|                |          |            | LL        | 48          | 26          | 0.936        | 1.071        | 5.891        | 7          | 0.289        |
| <i>25374</i>   | A        | 710        | LM        | 48          | 16          | 0.681        | 0.508        | 3.744        | 2          | 0.009        |
|                |          |            | LL        | 46          | 35          | 1.160        | 1.122        | 4.057        | 5          | 0.005        |
| <i>1152</i>    | A        | 568        | LM        | 50          | 13          | 0.461        | 0.511        | 4.092        | 4          | 0.045        |
|                |          |            | LL        | 42          | 12          | 0.399        | 0.491        | 3.999        | 3          | 0.053        |
| <i>25149</i>   | A        | 747        | LM        | 44          | 28          | 1.056        | 0.862        | 4.974        | 7          | 0.038        |
|                |          |            | LL        | 46          | 48          | 1.327        | 1.464        | 4.840        | 12         | 0.121        |
| <b>All</b>     | <b>A</b> | <b>478</b> | <b>LM</b> | <b>44.0</b> | <b>13.9</b> | <b>0.796</b> | <b>0.679</b> | <b>3.927</b> | <b>3.1</b> | <b>0.217</b> |
|                |          |            | <b>LL</b> | <b>44.3</b> | <b>22.0</b> | <b>0.850</b> | <b>0.994</b> | <b>3.944</b> | <b>5.4</b> | <b>0.217</b> |

<sup>1</sup> Length of the sequence (bp).

<sup>2</sup> *L. megarhynchos* (LM), *L. luscinia* (LL).

<sup>3</sup> Number of analyzed haploid sequences.

<sup>4</sup> Number of segregating sites.

<sup>5</sup> Average number of nucleotide differences.

<sup>6</sup> Proportion of polymorphic sites.

<sup>7</sup> Absolute divergence to *L. svecica* measured as average pairwise divergence.

<sup>9</sup> The minimum number of recombination events.

<sup>10</sup> The recombination parameter,  $R = 4Nr$ .

**Supplementary Figure 1.** Proportion of missing sites (A) and average coverage depth (B) per individual across individual samples. Samples of *L. megarhynchos* (LM) in green, *L. luscinia* (LL) in red, and *L. svecica* (LS) in blue.

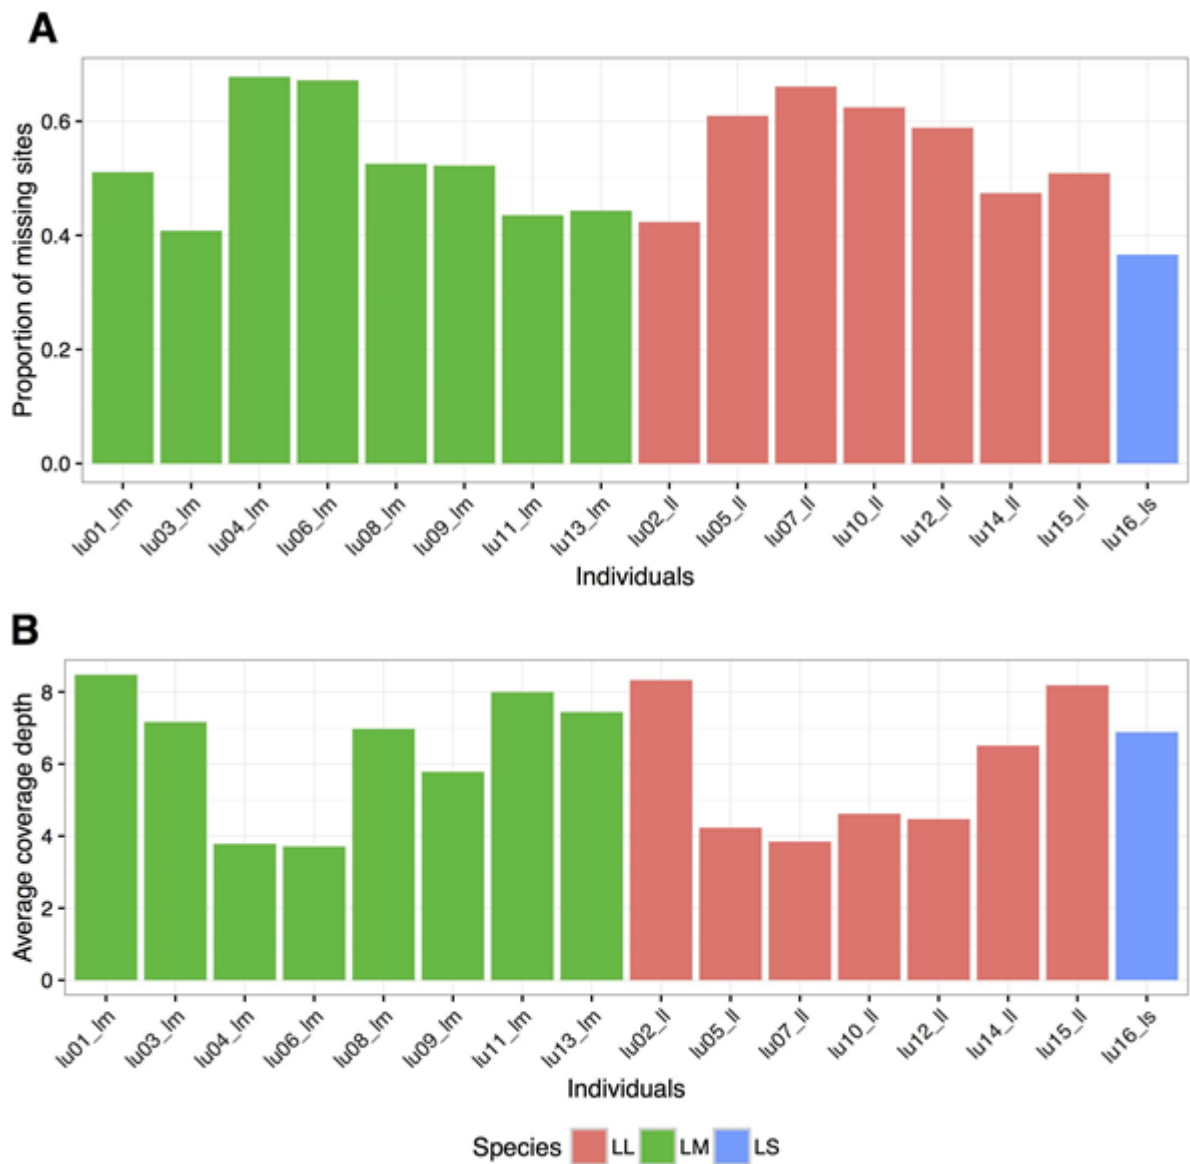



**Supplementary Figure 2.** Posterior probability distributions of migration parameters of the IM model for individual loci. Migration from *L. luscinia* to *L. megarhynchos* (m1, blue line), migration from *L. megarhynchos* to *L. luscinia* (m2, red line).

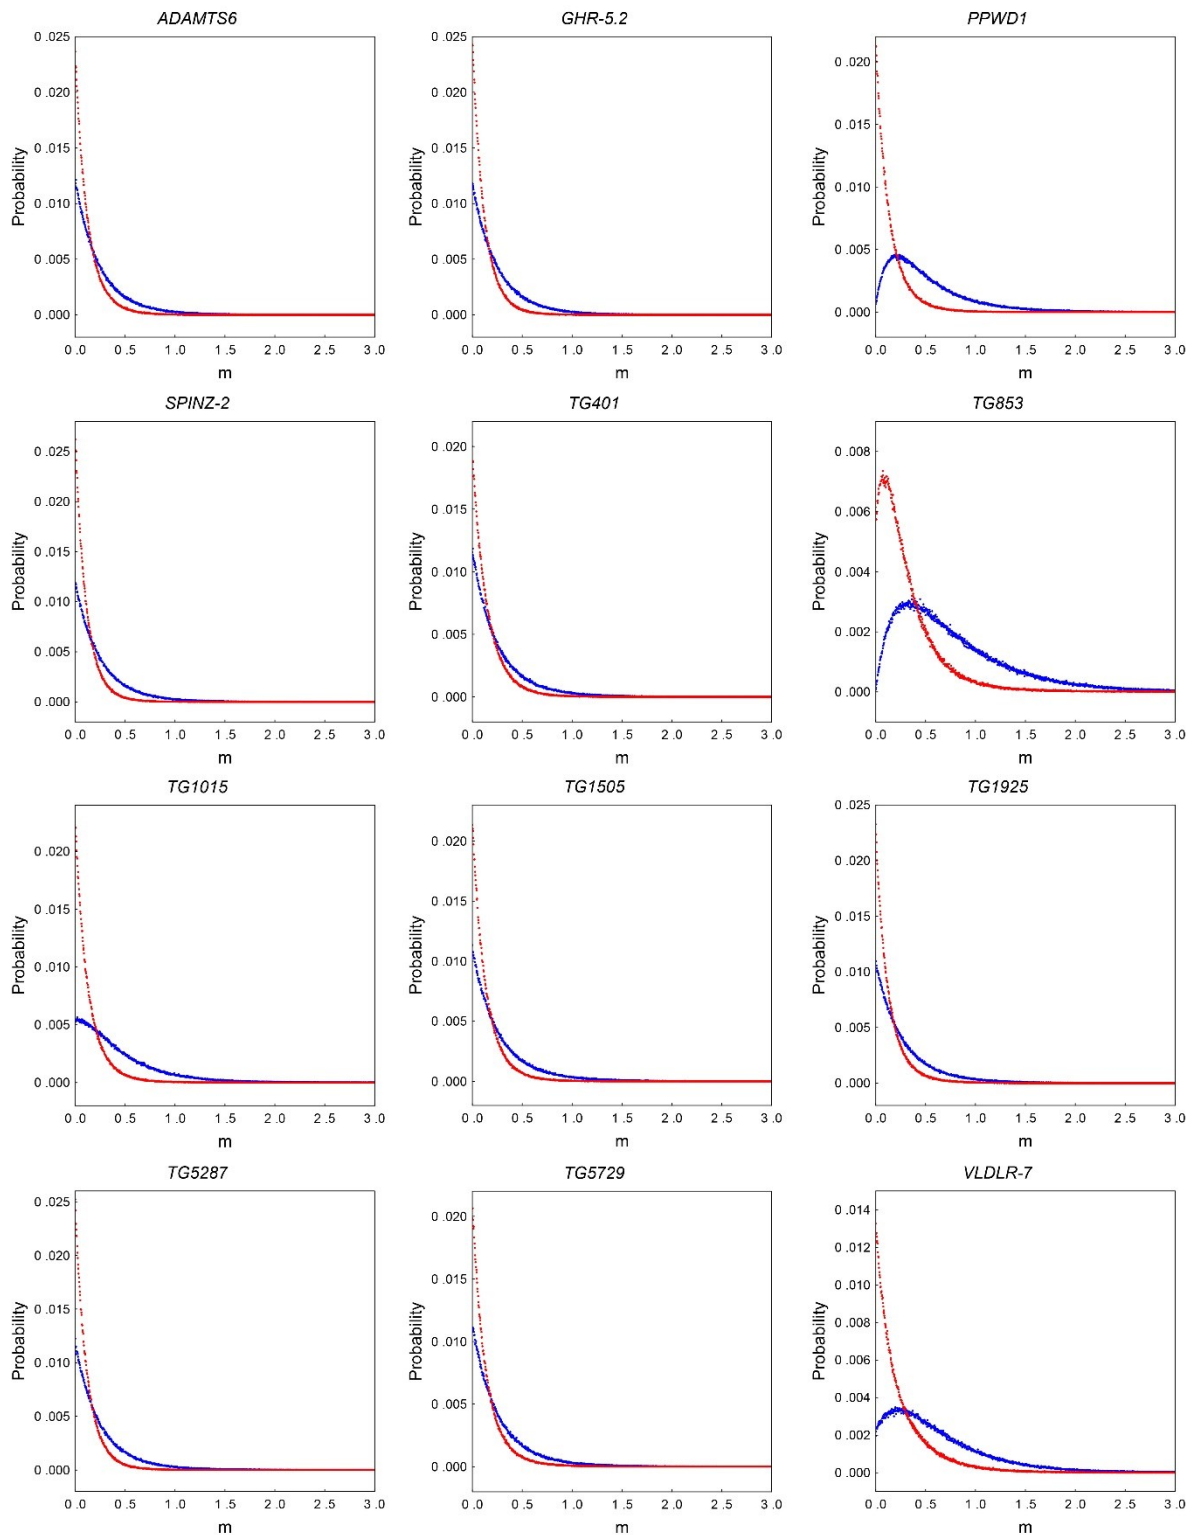

**Supplementary Figure 3.** Haplotype networks for 12 Z-linked intronic loci. Haplotypes coming from *L. megarhynchos* are represented by white circles and haplotypes from *L. luscinia* by black circles. Size of the circles is proportional to the number of haplotypes. Probable introgression events are marked by arrows. Interestingly, they seem to be mostly from *L. luscinia* to *L. megarhynchos* (white circles surrounded by the black ones). Haplotype networks were reconstructed with Network software using Median joining algorithm.

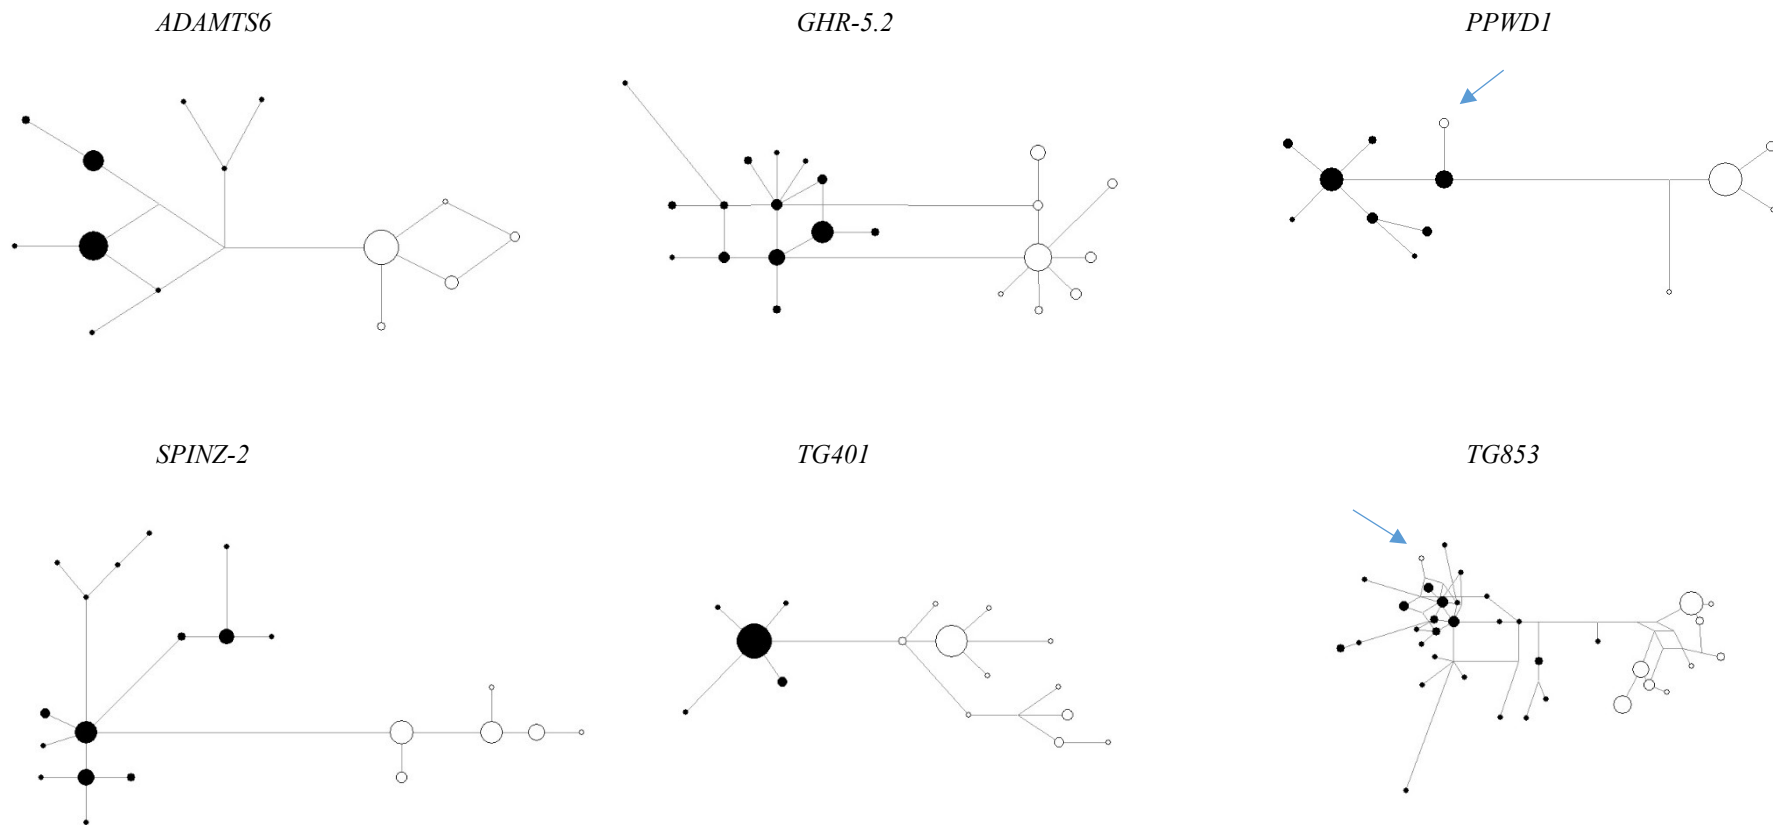

*TG1015*

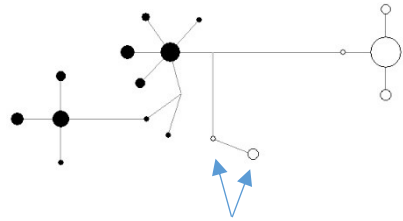

*TG1505*

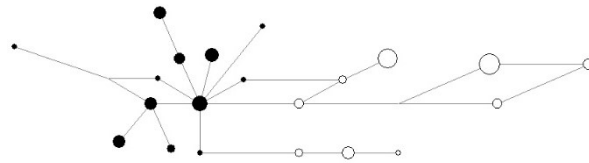

*TG1925*

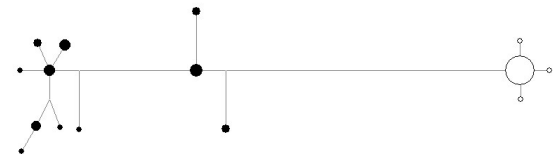

*TG5287*

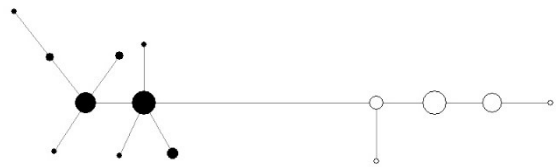

*TG5729*

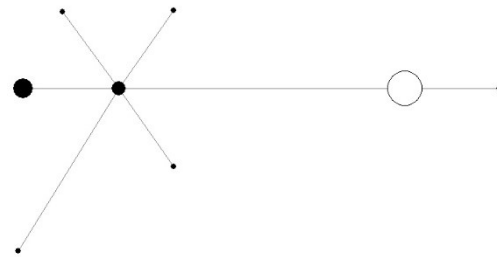

*VLDLR-7*

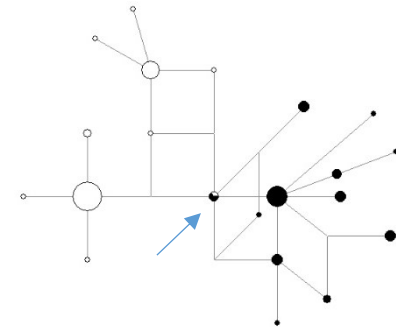

Supplement: 41437_2018_161_MOESM1_ESM.pdf [file 41437_2018_161_MOESM1_ESM.pdf]
